# Supplementary material for: Prognostic and therapeutic insights into colorectal carcinoma through immunogenic cell death gene profiling
Source: PeerJ. 2024 Jun 24;12:e17629. doi: 10.7717/peerj.17629 (PMC11210462; doi:10.7717/peerj.17629)
Supplement: Supplemental Information 27 [file peerj-12-17629-s027.xlsx]

## Sheet: Sheet1
HCT116
AKAP12	Gapdh	SiRNA	ΔCт	ΔCт Mean 0h	ΔΔCт	2-△△CT	Mean	SD	P
Si_NC	13.6529	20.5935	6.94061	6.92623	0.0143824	0.99008	1.00064	0.0358715
Si_NC	13.9689	20.8262	6.85737	6.92623	-0.0688592	1.04889
Si_NC	13.809	20.7897	6.98071	6.92623	0.0544768	0.962944
Si_AKAP12 1#	13.8471	22.5407	8.69359	6.92623	1.76736	0.293745	0.268366	0.0265042	2.03905e-05
Si_AKAP12 1#	13.7361	22.7714	9.03535	6.92623	2.10912	0.231789
Si_AKAP12 1#	13.7605	22.5255	8.76497	6.92623	1.83874	0.279565
Si_AKAP12 2#	13.5651	22.6353	9.07018	6.92623	2.14395	0.226259	0.221728	0.0125703	8.43929e-06
Si_AKAP12 2#	13.5487	22.5682	9.0195	6.92623	2.09327	0.234349
Si_AKAP12 2#	13.6136	22.8292	9.21553	6.92623	2.2893	0.204575
CALB2	Gapdh	SiRNA	ΔCт	ΔCт Mean 0h	ΔΔCт	2-△△CT	Mean	SD	P
Si_NC	13.8713	20.1366	6.26535	6.36036	-0.0950124	1.06807	1.00226	0.0665346
Si_NC	13.8537	20.3483	6.49465	6.36036	0.134291	0.911118
Si_NC	13.8791	20.2001	6.32108	6.36036	-0.0392782	1.0276
Si_CALB2 1#	13.9521	22.2906	8.33843	6.36036	1.97807	0.253829	0.251668	0.0308388	0.000132433
Si_CALB2 1#	13.8535	22.4459	8.59236	6.36036	2.232	0.212864
Si_CALB2 1#	13.8868	22.0414	8.15466	6.36036	1.79431	0.28831
Si_CALB2 2#	13.5689	21.9653	8.39646	6.36036	2.0361	0.243822	0.228384	0.0109167	8.42854e-05
Si_CALB2 2#	13.298	21.8378	8.53973	6.36036	2.17937	0.220772
Si_CALB2 2#	13.1647	21.7058	8.54113	6.36036	2.18077	0.220558
CYR61	Gapdh	SiRNA	ΔCт	ΔCт Mean 0h	ΔΔCт	2-△△CT	Mean	SD	P
Si_NC	14.6232	24.2569	9.63368	9.73417	-0.100489	1.07214	1.00412	0.0889826
Si_NC	14.2372	23.8848	9.64764	9.73417	-0.0865225	1.06181
Si_NC	14.3789	24.3001	9.92118	9.73417	0.187011	0.878424
Si_CYR61 1#	14.4883	26.2594	11.7711	9.73417	2.0369	0.243687	0.249686	0.00479712	0.00023943
Si_CYR61 1#	14.4937	26.2282	11.7345	9.73417	2.00033	0.249943
Si_CYR61 1#	14.5728	26.276	11.7032	9.73417	1.96901	0.255429
Si_CYR61 2#	14.4824	26.3686	11.8862	9.73417	2.15202	0.224998	0.218376	0.00706136	0.00023943
Si_CYR61 2#	14.2964	26.2918	11.9954	9.73417	2.26125	0.208591
Si_CYR61 2#	14.3082	26.2167	11.9085	9.73417	2.17437	0.221538
MEIS2	Gapdh	SiRNA	ΔCт	ΔCт Mean 0h	ΔΔCт	2-△△CT	Mean	SD	P
Si_NC	15.8713	25.3857	9.51444	9.40892	0.105527	0.929465	1.00177	0.0595822
Si_NC	15.8537	25.1577	9.30405	9.40892	-0.104865	1.07539
Si_NC	15.8791	25.2873	9.40825	9.40892	-0.000662486	1.00046
Si_MEIS2 1#	15.9521	27.4109	11.4587	9.40892	2.04981	0.241515	0.242992	0.00639919	4.64427e-05
Si_MEIS2 1#	15.8535	27.254	11.4005	9.40892	1.99158	0.251463
Si_MEIS2 1#	15.8868	27.3788	11.4921	9.40892	2.08315	0.235999
Si_MEIS2 2#	15.5689	27.2266	11.6577	9.40892	2.24883	0.210395	0.205002	0.00393472	4.64427e-05
Si_MEIS2 2#	15.298	27.0039	11.7059	9.40892	2.29696	0.203491
Si_MEIS2 2#	15.1647	26.8875	11.7228	9.40892	2.31388	0.201119
HT29
AKAP12	Gapdh	SiRNA	ΔCт	ΔCт Mean 0h	ΔΔCт	2-△△CT	Mean	SD	P
Si_NC	14.8263	22.5741	7.74781	7.99007	-0.242268	1.18285	1.0073	0.124438
Si_NC	14.8332	22.9276	8.09444	7.99007	0.104371	0.93021
Si_NC	14.8236	22.9516	8.12797	7.99007	0.137897	0.908843
Si_AKAP12 1#	14.9793	24.9392	9.95991	7.99007	1.96983	0.255282	0.260865	0.00442004	0.000805129
Si_AKAP12 1#	14.9187	24.8455	9.92674	7.99007	1.93666	0.26122
Si_AKAP12 1#	14.9347	24.8348	9.90008	7.99007	1.91	0.266092
Si_AKAP12 2#	13.6362	23.9775	10.3413	7.99007	2.35124	0.195977	0.203455	0.00922002	0.000805129
Si_AKAP12 2#	13.6817	23.8797	10.198	7.99007	2.20793	0.216444
Si_AKAP12 2#	13.5061	23.833	10.3269	7.99007	2.33684	0.197943
CALB2	Gapdh	SiRNA	ΔCт	ΔCт Mean 0h	ΔΔCт	2-△△CT	Mean	SD	P
Si_NC	13.5311	19.2862	5.75511	5.69141	0.0637021	0.956806	1.00059	0.0344158
Si_NC	13.5654	19.199	5.63359	5.69141	-0.057817	1.04089
Si_NC	13.6583	19.3438	5.68552	5.69141	-0.00588506	1.00409
Si_CALB2 1#	13.7693	21.4979	7.7286	5.69141	2.03719	0.243638	0.246791	0.0136733	8.8415e-06
Si_CALB2 1#	13.7552	21.5553	7.80017	5.69141	2.10877	0.231845
Si_CALB2 1#	13.8499	21.4578	7.60795	5.69141	1.91654	0.26489
Si_CALB2 2#	13.9368	21.65	7.7132	5.69141	2.02179	0.246252	0.226536	0.0166172	8.8415e-06
Si_CALB2 2#	13.7012	21.527	7.82588	5.69141	2.13447	0.227752
Si_CALB2 2#	13.6032	21.5767	7.97348	5.69141	2.28207	0.205603
CYR61	Gapdh	SiRNA	ΔCт	ΔCт Mean 0h	ΔΔCт	2-△△CT	Mean	SD	P
Si_NC	13.5431	24.5978	11.0547	10.9224	0.132291	0.912381	1.0045	0.0966003
Si_NC	13.509	24.4856	10.9765	10.9224	0.0541135	0.963186
Si_NC	13.5218	24.2578	10.736	10.9224	-0.186405	1.13792
Si_CYR61 1#	13.5284	26.212	12.6836	10.9224	1.76115	0.295013	0.289978	0.0169294	0.000369978
Si_CYR61 1#	13.4165	26.0392	12.6227	10.9224	1.70026	0.307731
Si_CYR61 1#	13.5269	26.3534	12.8265	10.9224	1.90406	0.26719
Si_CYR61 2#	13.8263	26.8805	13.0542	10.9224	2.13174	0.228182	0.236266	0.0136334	0.000369978
Si_CYR61 2#	13.8332	26.9066	13.0735	10.9224	2.15105	0.225149
Si_CYR61 2#	13.8236	26.7148	12.8912	10.9224	1.96879	0.255467
MEIS2	Gapdh	SiRNA	ΔCт	ΔCт Mean 0h	ΔΔCт	2-△△CT	Mean	SD	P
Si_NC	14.9793	25.5001	10.5208	10.5608	-0.0399906	1.02811	1.00041	0.028521
Si_NC	14.9187	25.5367	10.618	10.5608	0.0571384	0.961169
Si_NC	14.9347	25.4784	10.5437	10.5608	-0.0171478	1.01196
Si_MEIS2 1#	14.6362	27.299	12.6628	10.5608	2.10198	0.232938	0.228912	0.00533448	3.11177e-06
Si_MEIS2 1#	14.6817	27.418	12.7363	10.5608	2.17544	0.221374
Si_MEIS2 1#	14.5061	27.1721	12.666	10.5608	2.10516	0.232425
Si_MEIS2 2#	14.5311	27.4981	12.967	10.5608	2.40618	0.188654	0.201458	0.0103998	3.11177e-06
Si_MEIS2 2#	14.5654	27.3496	12.7843	10.5608	2.22346	0.214127
Si_MEIS2 2#	14.6583	27.5296	12.8713	10.5608	2.31049	0.201592
HCT116
CD274	Gapdh	SiRNA	ΔCт	ΔCт Mean 0h	ΔΔCт	2-△△CT	Mean	SD	P
Si_NC	14.8487	26.2515	11.4029	11.3965	0.00640933	0.995567	1.00105	0.0460108
Si_NC	14.9286	26.4026	11.474	11.3965	0.077582	0.947645
Si_NC	14.9159	26.2284	11.3125	11.3965	-0.0839914	1.05995
Si_AKAP12 1#	14.7569	27.5309	12.7741	11.3965	1.37761	0.384857	0.383537	0.00127012	4.54571e-05
Si_AKAP12 1#	14.5512	27.3367	12.7855	11.3965	1.38903	0.381822
Si_AKAP12 1#	14.6253	27.4028	12.7775	11.3965	1.38107	0.383933
Si_AKAP12 2#	14.8241	27.7751	12.951	11.3965	1.5545	0.340447	0.356782	0.0120233	4.37308e-05
Si_AKAP12 2#	14.8066	27.6413	12.8346	11.3965	1.43816	0.369037
Si_AKAP12 2#	14.7655	27.6324	12.8669	11.3965	1.47047	0.360864
CD274	Gapdh	SiRNA	ΔCт	ΔCт Mean 0h	ΔΔCт	2-△△CT	Mean	SD	P
Si_NC	14.7053	28.4206	13.7153	13.6733	0.0420002	0.971307	1.00244	0.0708512
Si_NC	14.8416	28.3768	13.5351	13.6733	-0.138144	1.10049
Si_NC	14.8115	28.581	13.7694	13.6733	0.0961439	0.93553
Si_CALB2 1#	14.7207	28.8341	14.1135	13.6733	0.440161	0.737053	0.753609	0.019701	0.00874194
Si_CALB2 1#	14.8846	28.9875	14.1029	13.6733	0.429574	0.742481
Si_CALB2 1#	14.8657	28.8951	14.0294	13.6733	0.356063	0.781294
Si_CALB2 2#	14.5805	28.7455	14.165	13.6733	0.491717	0.711178	0.720124	0.0255141	0.00607951
Si_CALB2 2#	14.7252	28.8042	14.079	13.6733	0.4057	0.75487
Si_CALB2 2#	14.5479	28.7475	14.1996	13.6733	0.526318	0.694325
CD274	Gapdh	SiRNA	ΔCт	ΔCт Mean 0h	ΔΔCт	2-△△CT	Mean	SD	P
Si_NC	14.8487	28.4502	13.6015	13.5814	0.02012	0.986151	1.00028	0.0238121
Si_NC	14.9286	28.5378	13.6092	13.5814	0.0278619	0.980873
Si_NC	14.9159	28.4493	13.5334	13.5814	-0.0479819	1.03382
Si_CYR61 1#	14.7569	29.2362	14.4793	13.5814	0.897941	0.536652	0.563138	0.023385	4.999e-05
Si_CYR61 1#	14.5512	28.9711	14.4199	13.5814	0.838485	0.559231
Si_CYR61 1#	14.6253	28.9593	14.334	13.5814	0.752602	0.593532
Si_CYR61 2#	14.8241	29.3554	14.5313	13.5814	0.949889	0.517672	0.516268	0.00114622	8.75723e-06
Si_CYR61 2#	14.8066	29.3458	14.5391	13.5814	0.957734	0.514865
Si_CYR61 2#	14.7655	29.3006	14.5352	13.5814	0.953809	0.516267
CD274	Gapdh	SiRNA	ΔCт	ΔCт Mean 0h	ΔΔCт	2-△△CT	Mean	SD	P
Si_NC	14.7053	29.422	14.7167	14.7894	-0.0727005	1.05168	1.00136	0.0516288
Si_NC	14.8416	29.5996	14.758	14.7894	-0.0314043	1.02201
Si_NC	14.8115	29.705	14.8935	14.7894	0.104105	0.930382
Si_MEIS2 1#	14.7207	30.2116	15.491	14.7894	0.701565	0.614905	0.6371	0.024634	0.000841965
Si_MEIS2 1#	14.8846	30.2486	15.364	14.7894	0.574644	0.671452
Si_MEIS2 1#	14.8657	30.3333	15.4676	14.7894	0.678206	0.624942
Si_MEIS2 2#	14.5805	30.1431	15.5626	14.7894	0.773183	0.585125	0.629354	0.0328752	0.00100671
Si_MEIS2 2#	14.7252	30.1056	15.3804	14.7894	0.591009	0.663879
Si_MEIS2 2#	14.5479	29.9833	15.4354	14.7894	0.645978	0.639059
HT29
CD274	Gapdh	SiRNA	ΔCт	ΔCт Mean 0h	ΔΔCт	2-△△CT	Mean	SD	P
Si_NC	14.8487	32.3211	17.4724	17.3268	0.145675	0.903956	1.00255	0.070413
Si_NC	14.9286	32.166	17.2374	17.3268	-0.0894038	1.06393
Si_NC	14.9159	32.1864	17.2705	17.3268	-0.0562712	1.03977
Si_AKAP12 1#	14.7569	33.7618	19.005	17.3268	1.67821	0.31247	0.327618	0.012438	0.000182082
Si_AKAP12 1#	14.5512	33.422	18.8708	17.3268	1.54399	0.342935
Si_AKAP12 1#	14.6253	33.5627	18.9374	17.3268	1.61065	0.32745
Si_AKAP12 2#	14.8241	33.9254	19.1013	17.3268	1.77454	0.292287	0.2901	0.00262213	0.000138947
Si_AKAP12 2#	14.8066	33.9113	19.1047	17.3268	1.77794	0.291599
Si_AKAP12 2#	14.7655	33.8961	19.1306	17.3268	1.80383	0.286413
CD274	Gapdh	SiRNA	ΔCт	ΔCт Mean 0h	ΔΔCт	2-△△CT	Mean	SD	P
Si_NC	14.7053	31.7613	17.0559	17.0013	0.0546112	0.962854	1.00036	0.0265643
Si_NC	14.8416	31.8129	16.9713	17.0013	-0.0299978	1.02101
Si_NC	14.8115	31.7882	16.9767	17.0013	-0.0246134	1.01721
Si_CALB2 1#	14.7207	32.4374	17.7167	17.0013	0.715404	0.609035	0.664014	0.039562	0.000565995
Si_CALB2 1#	14.8846	32.437	17.5524	17.0013	0.551049	0.682524
Si_CALB2 1#	14.8657	32.3806	17.5149	17.0013	0.513574	0.700485
Si_CALB2 2#	14.5805	32.336	17.7555	17.0013	0.754194	0.592877	0.627032	0.0271128	0.00015492
Si_CALB2 2#	14.7252	32.3277	17.6025	17.0013	0.60121	0.659201
Si_CALB2 2#	14.5479	32.2181	17.6701	17.0013	0.668826	0.629018
CD274	Gapdh	SiRNA	ΔCт	ΔCт Mean 0h	ΔΔCт	2-△△CT	Mean	SD	P
Si_NC	14.7851	32.4334	17.6483	17.6535	-0.00517941	1.0036	1.00002	0.00674106
Si_NC	14.794	32.439	17.645	17.6535	-0.00847244	1.00589
Si_NC	14.7304	32.3976	17.6672	17.6535	0.0136518	0.990582
Si_CYR61 1#	14.5201	33.3723	18.8523	17.6535	1.19875	0.435654	0.438861	0.0138448	8.48382e-07
Si_CYR61 1#	14.5359	33.4282	18.8923	17.6535	1.23876	0.423738
Si_CYR61 1#	14.5287	33.3113	18.7826	17.6535	1.12913	0.457192
Si_CYR61 2#	14.6874	33.9234	19.236	17.6535	1.58252	0.333899	0.345153	0.00859679	1.16062e-07
Si_CYR61 2#	14.7229	33.8715	19.1486	17.6535	1.49507	0.354764
Si_CYR61 2#	14.716	33.8974	19.1814	17.6535	1.52784	0.346796
CD274	Gapdh	SiRNA	ΔCт	ΔCт Mean 0h	ΔΔCт	2-△△CT	Mean	SD	P
Si_NC	14.6584	31.5541	16.8957	16.886	0.00970033	0.993299	1.00014	0.0168762
Si_NC	14.6455	31.4982	16.8527	16.886	-0.0333197	1.02336
Si_NC	14.8036	31.7132	16.9096	16.886	0.0236194	0.983762
Si_MEIS2 1#	14.9276	32.9756	18.048	16.886	1.162	0.446892	0.455288	0.0163584	5.16172e-06
Si_MEIS2 1#	14.8096	32.7601	17.9505	16.886	1.06445	0.478155
Si_MEIS2 1#	14.7011	32.7689	18.0678	16.886	1.18175	0.440817
Si_MEIS2 2#	14.527	32.5982	18.0712	16.886	1.18517	0.439773	0.436039	0.0146764	3.68704e-06
Si_MEIS2 2#	14.5606	32.5927	18.0321	16.886	1.14607	0.451853
Si_MEIS2 2#	14.4832	32.6329	18.1497	16.886	1.26365	0.41649
AKAP12	Gapdh	SiRNA	ΔCт	ΔCт Mean 0h	ΔΔCт	2-△△CT	Mean	SD	P
NCM460	14.9806	23.7105	8.72981	8.88296	-0.153146	1.11199	0.972502	0.0752636
NCM460	14.8816	23.8208	8.93925	8.82962	0.109628	0.926827
NCM460	14.9798	23.8306	8.85075	8.82962	0.021123	0.985465
NCM460	14.7778	23.8075	9.02964	8.82962	0.200018	0.87054
NCM460	14.8779	23.7976	8.91961	8.82962	0.089988	0.939531
NCM460	14.9815	23.8101	8.82868	8.82962	-0.000944	1.00065
HCT116	14.9512	20.6438	5.69263	8.82962	-3.13699	8.79688	9.18872	0.386387	4.91479e-13
HCT116	14.9788	20.5333	5.5545	8.82962	-3.27512	9.68077
HCT116	14.9693	20.5527	5.58332	8.82962	-3.2463	9.4893
HCT116	14.9812	20.6656	5.68438	8.82962	-3.14524	8.84732
HCT116	14.978	20.6739	5.69585	8.82962	-3.13377	8.77727
HCT116	14.9688	20.5444	5.57552	8.82962	-3.2541	9.54075
HT29	14.8815	21.7589	6.87743	8.82962	-1.95219	3.86961	4.34439	0.275474	1.40052e-10
HT29	14.9793	21.6666	6.68734	8.82962	-2.14228	4.41461
HT29	14.9768	21.6471	6.67026	8.82962	-2.15937	4.46719
HT29	14.9802	21.7562	6.77591	8.82962	-2.05371	4.15173
HT29	14.9777	21.5579	6.58014	8.82962	-2.24949	4.75514
HT29	14.9691	21.6585	6.68947	8.82962	-2.14015	4.40809
LOVO	14.9798	23.5131	8.53329	8.82962	-0.296334	1.22802	1.14827	0.0493488	0.00140577
LOVO	14.9375	23.6221	8.68465	8.82962	-0.144976	1.10571
LOVO	14.9577	23.5441	8.58631	8.82962	-0.243317	1.18371
LOVO	14.9669	23.6749	8.70796	8.82962	-0.12166	1.08799
LOVO	14.981	23.6536	8.67266	8.82962	-0.156966	1.11494
LOVO	14.98	23.584	8.60406	8.82962	-0.225563	1.16923
CALB2	Gapdh	SiRNA	ΔCт	ΔCт Mean 0h	ΔΔCт	2-△△CT	Mean	SD	P
NCM460	14.63	25.5341	10.9041	10.972	-0.0678628	1.04816	1.00085	0.040855
NCM460	14.5313	25.6173	11.086	10.972	0.113986	0.924031
NCM460	14.6274	25.6247	10.9973	10.972	0.0252832	0.982628
NCM460	14.5483	25.5185	10.9702	10.972	-0.00180483	1.00125
NCM460	14.6517	25.5684	10.9167	10.972	-0.0552708	1.03905
NCM460	14.6397	25.5974	10.9576	10.972	-0.0143308	1.00998
HCT116	14.7109	23.8674	9.15646	10.972	-1.81552	3.51986	3.50048	0.183083	4.23843e-11
HCT116	14.6969	23.8957	9.19874	10.972	-1.77324	3.4182
HCT116	14.6601	23.7665	9.10634	10.972	-1.86564	3.6443
HCT116	14.6509	23.7367	9.08586	10.972	-1.88612	3.69641
HCT116	14.5272	23.8473	9.32016	10.972	-1.65182	3.14231
HCT116	14.6269	23.7582	9.1313	10.972	-1.84068	3.58179
HT29	14.6407	23.0807	8.44006	10.972	-2.53192	5.7834	5.57759	0.419621	3.20806e-10
HT29	14.6506	23.1917	8.54111	10.972	-2.43087	5.3922
HT29	14.5392	23.1238	8.5846	10.972	-2.38738	5.23208
HT29	14.6203	22.9334	8.31305	10.972	-2.65893	6.31565
HT29	14.6297	23.0881	8.45836	10.972	-2.51362	5.71052
HT29	14.6703	23.3112	8.64093	10.972	-2.33105	5.03171
LOVO	14.6492	24.82	10.1708	10.972	-0.801185	1.74253	1.81793	0.0899511	4.60829e-09
LOVO	14.7305	24.7687	10.0382	10.972	-0.933828	1.91034
LOVO	14.5908	24.8299	10.2391	10.972	-0.732841	1.66191
LOVO	14.6776	24.7209	10.0433	10.972	-0.928713	1.90358
LOVO	14.7213	24.7907	10.0695	10.972	-0.902514	1.86932
LOVO	14.6307	24.7388	10.1081	10.972	-0.863883	1.81993
CYR61	Gapdh	SiRNA	ΔCт	ΔCт Mean 0h	ΔΔCт	2-△△CT	Mean	SD	P
NCM460	14.6787	24.6505	9.97179	9.98474	-0.0129578	1.00902	1.00049	0.0310312
NCM460	14.6312	24.5801	9.94894	9.98474	-0.0358008	1.02513
NCM460	14.6809	24.6227	9.94189	9.98474	-0.0428528	1.03015
NCM460	14.6691	24.7208	10.0518	9.98474	0.0670422	0.954593
NCM460	14.6978	24.6492	9.95139	9.98474	-0.0333518	1.02339
NCM460	14.5892	24.6319	10.0427	9.98474	0.0579212	0.960647
HCT116	14.6789	22.5408	7.86196	9.98474	-2.12278	4.35532	4.25467	0.209451	1.03045e-11
HCT116	14.6902	22.5381	7.84785	9.98474	-2.13689	4.39813
HCT116	14.5808	22.6181	8.03732	9.98474	-1.94742	3.85684
HCT116	14.6503	22.5965	7.94619	9.98474	-2.03855	4.10834
HCT116	14.7014	22.5268	7.82537	9.98474	-2.15938	4.46722
HCT116	14.6804	22.5467	7.86633	9.98474	-2.11841	4.34215
HT29	14.6703	22.5664	7.89609	9.98474	-2.08865	4.2535	4.05627	0.138813	3.6864e-13
HT29	14.6377	22.5879	7.95022	9.98474	-2.03452	4.09687
HT29	14.582	22.6283	8.04625	9.98474	-1.93849	3.83304
HT29	14.7175	22.6469	7.92937	9.98474	-2.05538	4.15652
HT29	14.6573	22.619	7.9617	9.98474	-2.02305	4.06441
HT29	14.5788	22.5878	8.009	9.98474	-1.97574	3.9333
LOVO	14.6277	23.6971	9.06938	9.98474	-0.915363	1.88604	1.93045	0.0780798	2.64955e-10
LOVO	14.681	23.6366	8.95569	9.98474	-1.02905	2.04069
LOVO	14.6785	23.7168	9.03831	9.98474	-0.946428	1.9271
LOVO	14.6317	23.7478	9.11608	9.98474	-0.868664	1.82597
LOVO	14.5922	23.6673	9.07515	9.98474	-0.909592	1.87851
LOVO	14.7273	23.6945	8.96723	9.98474	-1.01751	2.02442
MEIS2	Gapdh	SiRNA	ΔCт	ΔCт Mean 0h	ΔΔCт	2-△△CT	Mean	SD	P
NCM460	14.5698	24.7944	10.2246	10.1916	0.033015	0.977376	1.0003	0.0244644
NCM460	14.5501	24.7384	10.1883	10.1916	-0.003239	1.00225
NCM460	14.5466	24.784	10.2374	10.1916	0.045878	0.9687
NCM460	14.6165	24.8151	10.1986	10.1916	0.007041	0.995131
NCM460	14.657	24.7882	10.1311	10.1916	-0.060419	1.04277
NCM460	14.5978	24.7671	10.1693	10.1916	-0.022276	1.01556
HCT116	14.5367	23.1663	8.62958	10.1916	-1.56199	2.9526	2.97498	0.0953653	7.30653e-13
HCT116	14.5607	23.2329	8.67215	10.1916	-1.51942	2.86675
HCT116	14.559	23.1961	8.6371	10.1916	-1.55447	2.93725
HCT116	14.6473	23.1758	8.52842	10.1916	-1.66315	3.16707
HCT116	14.5577	23.2034	8.64569	10.1916	-1.54587	2.9198
HCT116	14.6196	23.2232	8.60354	10.1916	-1.58803	3.00638
HT29	14.5574	22.5402	7.9828	10.1916	-2.20877	4.62279	4.89363	0.226187	3.54347e-12
HT29	14.5985	22.436	7.83749	10.1916	-2.35407	5.11266
HT29	14.5879	22.5171	7.92918	10.1916	-2.26238	4.79783
HT29	14.5499	22.537	7.98713	10.1916	-2.20443	4.60894
HT29	14.629	22.4585	7.82945	10.1916	-2.36211	5.14122
HT29	14.6406	22.4878	7.84722	10.1916	-2.34435	5.07832
LOVO	14.5981	23.5687	8.97059	10.1916	-1.22097	2.33104	2.32398	0.127136	5.78501e-10
LOVO	14.5599	23.6061	9.04612	10.1916	-1.14545	2.21215
LOVO	14.6586	23.5992	8.94055	10.1916	-1.25102	2.3801
LOVO	14.5799	23.6162	9.03632	10.1916	-1.15524	2.22722
LOVO	14.5496	23.5896	9.03999	10.1916	-1.15158	2.22157
LOVO	14.7068	23.5356	8.82877	10.1916	-1.36279	2.57182
