# Supplementary material for: Prognostic and therapeutic insights into colorectal carcinoma through immunogenic cell death gene profiling
Source: PeerJ. 2024 Jun 24;12:e17629. doi: 10.7717/peerj.17629 (PMC11210462; doi:10.7717/peerj.17629)
Supplement: Supplemental Information 28 [file peerj-12-17629-s028.xlsx]

## Sheet: Sheet1
HCT116	OD(450nm)
AKAP12		siNC				siAKAP12 1#				siAKAP12 2#
0h	0.8731	0.8694	0.9045	0.8952	0.8731	0.8694	0.9045	0.8952	0.8731	0.8694	0.9045	0.8952
24h	1.5024	1.5171	1.5201	1.5359	1.2772	1.2894	1.285	1.2822	1.0724	1.0571	1.0601	1.0859
48h	1.9205	1.9433	1.9317	1.9595	1.6879	1.6324	1.6708	1.6524	1.5024	1.5171	1.5201	1.5359
72h	2.1496	2.1319	2.1254	2.1173	1.8649	1.8983	1.8891	1.8727	1.7383	1.7264	1.7857	1.7909
96h	2.6063	2.5417	2.589	2.5622	2.2319	2.1818	2.1843	2.2572	2.0849	2.127	2.0987	2.139
CALB2		siNC				siCALB2 1#				siCALB2 2#
0h	0.7831	0.7654	0.8013	0.7981	0.8762	0.8518	0.8688	0.8502	0.8541	0.9026	0.8729	0.8616
24h	1.2319	1.1918	1.1943	1.2572	1.0974	1.0458	1.0945	1.13	1.0125	1.0633	1.098	1.0751
48h	1.5024	1.5171	1.5201	1.5359	1.2398	1.2417	1.2567	1.2227	1.2398	1.2417	1.2567	1.2227
72h	1.7142	1.707	1.7151	1.6987	1.4296	1.459	1.4521	1.4408	1.4022	1.4448	1.4067	1.4192
96h	1.9205	1.9433	1.9317	1.9595	1.6478	1.66	1.6784	1.6288	1.6389	1.5885	1.6622	1.5996
CYR61		siNC				siCYR61 1#				siCYR61 2#
0h	0.7639	0.7538	0.7411	0.7824	0.7635	0.7771	0.7829	0.7835	0.7964	0.7521	0.7454	0.8032
24h	1.2643	1.2792	1.2604	1.2582	1.0724	1.0571	1.0601	1.0859	0.9492	0.9676	0.9842	0.9719
48h	1.4912	1.4598	1.4732	1.4852	1.2315	1.253	1.2728	1.262	1.2205	1.2433	1.2317	1.2595
72h	1.6914	1.7154	1.7023	1.7249	1.4468	1.4935	1.4722	1.4634	1.389	1.4125	1.4002	1.3945
96h	2.0069	1.9845	2.0164	2.0322	1.6116	1.6451	1.6263	1.6665	1.5753	1.5838	1.5685	1.5912
MEIS2		siNC				siMEIS2 1#				siMEIS2 2#
0h	0.6154	0.6017	0.6079	0.616	0.6443	0.6237	0.635	0.6257	0.6604	0.6189	0.6245	0.658
24h	1.042	1.0682	1.0301	1.0564	0.8622	0.8028	0.8778	0.862	0.8399	0.8376	0.8274	0.8291
48h	1.4964	1.4521	1.4454	1.4632	1.0434	1.0425	1.0205	1.0347	1.0633	1.098	1.0751	1.078
72h	1.7428	1.7978	1.738	1.7485	1.4366	1.4384	1.46	1.4787	1.4504	1.4215	1.4408	1.4583
96h	2.1876	2.1889	2.1825	2.1979	1.6554	1.6722	1.6397	1.6584	1.5868	1.5496	1.5892	1.5742
HT29
AKAP12		siNC				siAKAP12 1#				siAKAP12 2#
0h	0.7731	0.7694	0.8045	0.7952	0.7807	0.7942	0.8073	0.8175	0.7883	0.7764	0.7857	0.7909
24h	1.2315	1.253	1.2728	1.262	1.0821	1.066	0.9935	1.0347	1.0724	1.0571	1.0601	1.0859
48h	1.4643	1.4977	1.4518	1.5028	1.2807	1.2742	1.2573	1.2375	1.2205	1.2433	1.2317	1.2595
72h	1.6816	1.6424	1.6337	1.6883	1.4912	1.4598	1.4732	1.4852	1.3221	1.349	1.3259	1.3413
96h	1.8821	1.889	1.8959	1.8713	1.6116	1.6451	1.6263	1.6665	1.5808	1.5332	1.5403	1.552
CALB2		siNC				siCALB2 1#				siCALB2 2#
0h	0.7142	0.707	0.7151	0.6807	0.6916	0.7037	0.6846	0.7031	0.7189	0.7085	0.7022	0.6996
24h	1.0724	1.0571	1.0601	1.0859	0.8731	0.8694	0.9045	0.8952	0.8731	0.8694	0.9045	0.8952
48h	1.2807	1.2742	1.2573	1.2375	1.0374	1.0458	1.0945	1.13	1.0633	1.098	1.0751	1.078
72h	1.4633	1.498	1.4751	1.478	1.2845	1.2424	1.2092	1.2313	1.2382	1.2409	1.2394	1.2388
96h	1.8947	1.8642	1.8864	1.8808	1.4649	1.408	1.4735	1.4856	1.4786	1.4437	1.4663	1.4273
CYR61		siNC				siCYR61 1#				siCYR61 2#
0h	0.6849	0.6404	0.6143	0.65598	0.717	0.7098	0.7123	0.7076	0.7012	0.7194	0.6898	0.6736
24h	1.0203	1.0043	1.0674	1.0223	0.8399	0.8376	0.8274	0.8491	0.8223	0.8012	0.8404	0.8348
48h	1.2772	1.2894	1.285	1.2822	1.0724	1.0571	1.0601	1.0859	0.9374	1.0458	1.0945	1.13
72h	1.5399	1.5454	1.5281	1.534	1.3706	1.3185	1.3894	1.3821	1.3303	1.3668	1.3321	1.3464
96h	1.7797	1.7357	1.7607	1.7514	1.4107	1.4086	1.4721	1.4136	1.6894	1.4421	1.4388	1.4051
MEIS2		siNC				siCYR61 1#				siCYR61 2#
0h	0.5802	0.5538	0.5601	0.5373	0.5684	0.5302	0.5663	0.5252	0.5547	0.5717	0.5536	0.5895
24h	0.9777	0.9726	0.9222	0.9648	0.7473	0.7345	0.7415	0.7569	0.7335	0.7325	0.7356	0.7879
48h	1.3504	1.3135	1.365	1.3278	1.0564	1.0717	1.0776	1.0767	1.0377	1.0447	1.0374	1.0341
72h	1.7451	1.7372	1.7191	1.7155	1.2379	1.2997	1.2356	1.2571	1.2669	1.2488	1.2512	1.2319
96h	2.1113	2.1736	2.1351	2.1965	1.6313	1.6225	1.6072	1.6543	1.6567	1.6374	1.6113	1.6516
